# Supplementary material
Source: PubMed Central journal article supplement (PMC9157147)
Supplement: kiac071_supplementary_data.pdf [file kiac071_supplementary_data.pdf]

1 **Supplemental Data**

2 **miR2105 and kinase OsSAPK10 co-regulate OsbZIP86 to mediate**  
3 **drought-induced ABA biosynthesis in rice**

4 Weiwei Gao, Mingkang Li, Songguang Yang, Chunzhi Gao, Yan Su, Xuan Zeng,  
5 Zhengli Jiao, Weijuan Xu, Mingyong Zhang\* and Kuaifei Xia\*

6

7 \* Correspondence author:

8 Mingyong Zhang (e-mail: zhangmy@scbg.ac.cn) and Kuaifei Xia (e-mail: xiakuaifei@scbg.ac.cn),

9 South China Botanical Garden, Chinese Academy of Sciences, Guangzhou 510650, China.

10 **Supplementary Data include:**

11 Supplemental Tables 1-2

12 Supplemental Figures 1-11

13

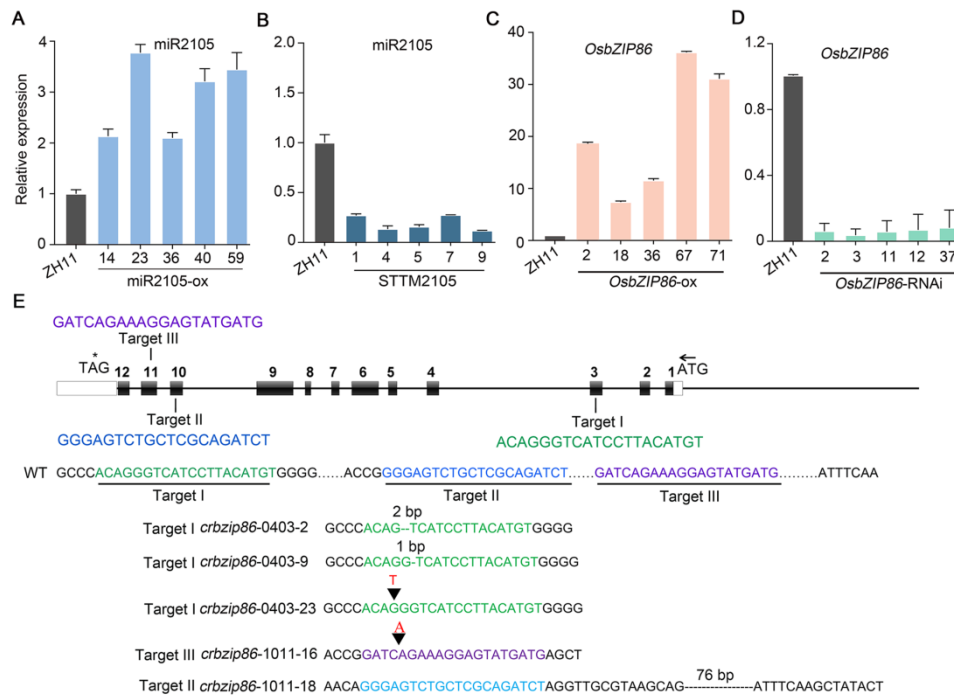

46

47 **Supplemental Figure S1.** Identification of miR2105 and *OsbZIP86* transgenic rice.

48 (A,B) Expression levels of miR2105 in seedlings of transgenic rice overexpressing miR2105

49 (miR2105-ox) or with downregulation of miR2105 (STTM2105). *U6* was used as a miRNA reference

50 gene. (C,D) Expression levels of *OsbZIP86* in seedlings of transgenic rice overexpressing *OsbZIP86*

51 (*OsbZIP86-ox*) and *OsbZIP86*-RNAi. *e-EF-1a* was used as an mRNA reference gene. Means  $\pm$  SD (n =

52 3) are shown in (A–D). All qRT-PCR analyses for gene expression were performed using three

53 biological replicates with similar results. (E) Generation of target-site mutations of *OsbZIP86* in

54 representative knockout lines (*crbzip86*) using the CRISPR/Cas9 system. The sequences located in the

55 third, tenth, and 11th exons of *OsbZIP86* were selected as target sites of the sgRNA. Filled black bars

56 indicate exons and lines represent introns of *OsbZIP86*. The white boxes represent the 3' and 5'

57 untranslated regions. The black arrow shows the start codon, and the black asterisk indicates the stop

58 codon. The “T” and “A” insertions are marked with red; deletions are marked with green or black

59 dashes.

60

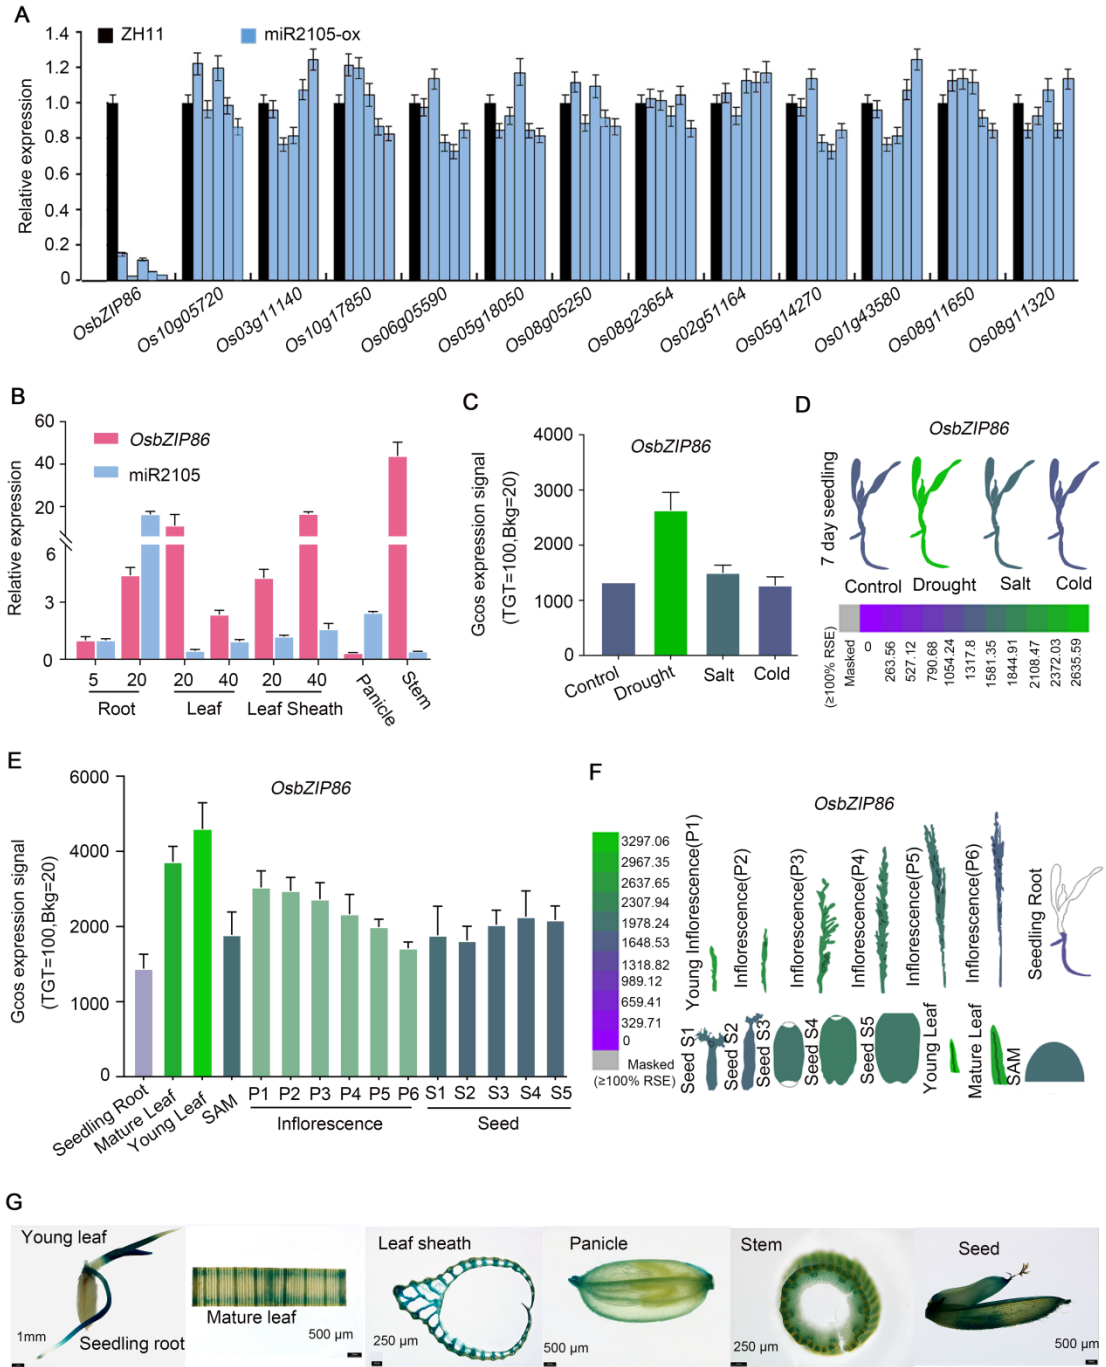

61

62 **Supplemental Figure S2.** *OsbZIP86* is a target gene of miR2105 and the expression pattern analyses  
 63 of *OsbZIP86*.

64 (A) Expression levels of the predicted 13 target genes of miR2105 in leaves of the wild-type ZH11 and  
 65 miR2105-ox lines. Means  $\pm$  SD (n = 3) are shown. All qRT-PCR analyses for genes expression were  
 66 performed with three biological replicates with similar results. (B) Expression patterns of miR2105 and  
 67 *OsbZIP86* in various organs of ZH11 under normal growth conditions by qRT-PCR. Expression of  
 68 roots of 5-day-old seedlings were normalized as 1. Means  $\pm$  SD (n = 3) are shown. All qRT-PCR

69 analyses for gene expression were performed with three biological repeats with similar results. (C–F)  
70 Expression patterns of *OsZIP86* under drought, salt, and cold stresses (C,D) and in various organs of  
71 rice (E,F). Datas are from the Rice eFP Browser (<http://bar.utoronto.ca/efprice/cgi-bin/efpWeb.cgi>).  
72 The GeneChip operating software (GCOS) was used for calculation of the expression values with a  
73 target intensity (TGT) value of 100. Most tissues were sampled in triplicate. The image was generated  
74 with Plant eFP (<http://bar.utoronto.ca/eplant>). Values are means  $\pm$  SD of three biological replicates. (G)  
75 Activity of *OsZIP86* promoter in different tissues in transgenic rice by GUS staining of *OsZIP86pro*:  
76 *GUS* transgenic rice under normal conditions.

77  
78

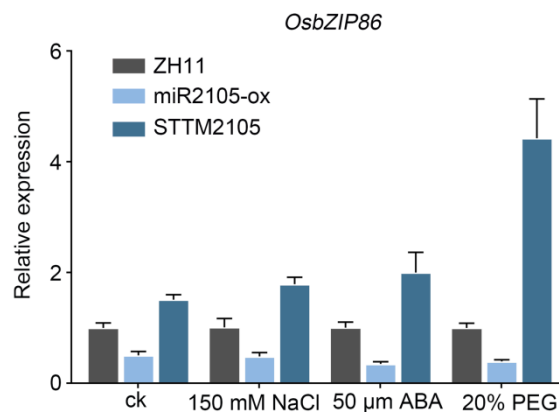

79  
80 **Supplemental Figure S3.** Expression changes of *OsZIP86* in ZH11, miR2105-ox and STTM2105  
81 under normal conditions and treatment of salt, ABA and PEG.

82 Total RNA was isolated from 2-week-old rice seedlings grown in Yoshida solution. For salt, ABA and  
83 PEG treatments, 2-week-old seedlings grown in Yoshida solution were treated with 150 mM NaCl, 50  
84 μM ABA or 20 % PEG for 2 h. *e-EF-1a* was used as mRNA reference gene, and the *OsZIP86*  
85 expression of ZH11 under different condition was normalized as 1, respectively. Means  $\pm$  SD (n = 3) are  
86 shown.

87

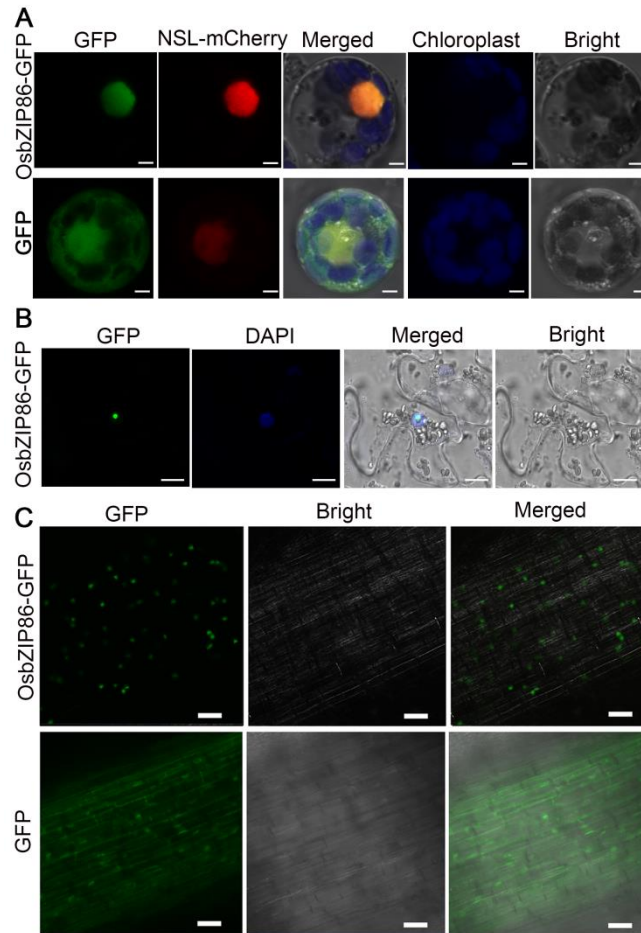

88

89 **Supplemental Figure S4.** Subcellular localization of OsbZIP86.

90 (A) Subcellular localization of OsbZIP86 in rice protoplasts. Vector construct *35S: OsbZIP86-GFP* and  
 91 *35S: GFP* were co-transiently expressed with a nuclear marker (NSL-mCherry) in rice protoplasts,  
 92 respectively. (B) DAPI staining assays of OsbZIP86 in tobacco leaves. (C) Subcellular localization of  
 93 OsbZIP86 in roots of stable transgenic rice expressing *Ubi: OsbZIP86-GFP* or *Ubi: GFP*. Scale bars, 3  
 94  $\mu\text{m}$  (A), 250  $\mu\text{m}$  (B) and 10  $\mu\text{m}$  (C).

95

96

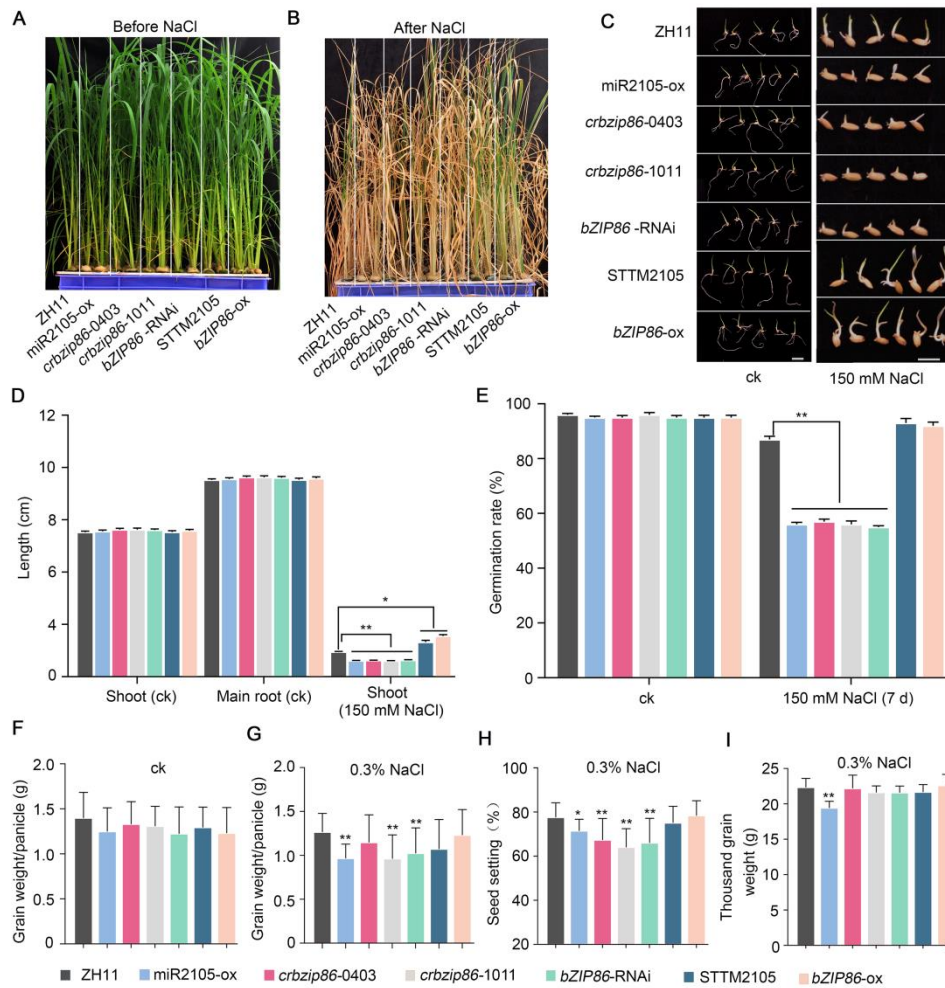

97

98 **Supplemental Figure S5.** miR2105 and *OsbZIP86* mediate salt resistance and grain yield of rice under  
 99 salt treatment.

100 (A,B) Phenotypes of miR2105 and *OsbZIP86* transgenic rice seedlings under 150 mM NaCl treatment.  
 101 4-week-old seedlings were grown in Yoshida solution and then transferred into Yoshida solution with  
 102 150 mM NaCl for 10 d, then recovered with Yoshida solution for one week. Experiments were  
 103 performed with three biological replicates with similar results. (C–D) Photographs (C), lengths of  
 104 shoots and main roots (D), and rates of seed germination (E) of miR2105 and *OsbZIP86* transgenic rice  
 105 seedlings under salt stress. Seeds were placed on double sheets of filter paper in a 9-cm Petri dish  
 106 moistened with 150 mM NaCl for 7 d. Scale bar, 1 cm. Experiments used three biological replicates  
 107 with similar results, and two independent lines were used for each transgenic construction. Each repeat  
 108 was measured in 30 independent seeds. Values are means  $\pm$  SD of 30 independent plants. (F–I)  
 109 Statistics of main agronomic traits of miR2105 and *OsbZIP86* transgenic rice under normal and NaCl  
 110 conditions. Rice plants were grown in boxes filled with field soil. For salt treatment, the plants were  
 111 grown under normal conditions until flowering, then treated with 0.3% NaCl from flowering to mature

112 grain. Each repeat was measured in at least 20 independent plants. Values are means  $\pm$  SD; \* $p < 0.05$ ,  
113 \*\* $p < 0.01$  according to student's  $t$ -test (D-I).

114

115

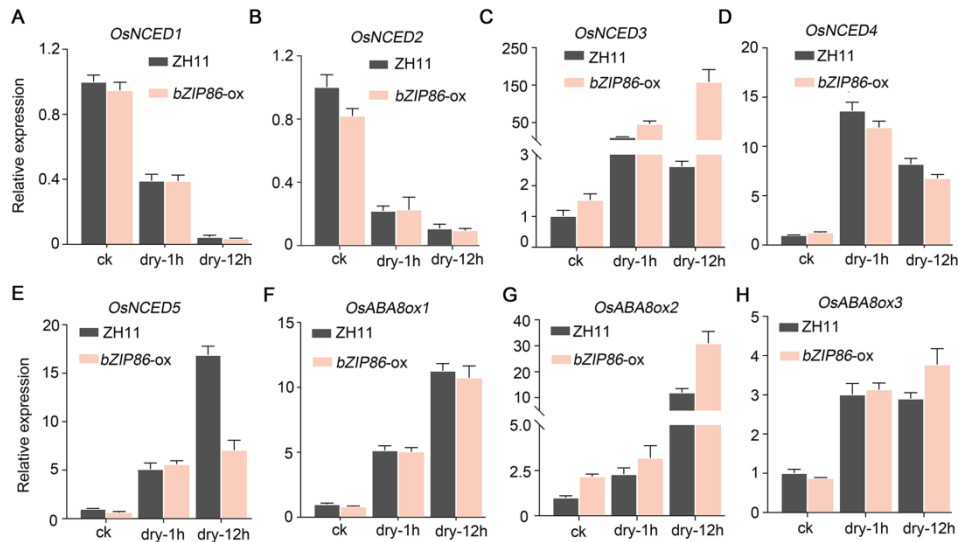

116

117 **Supplemental Figure S6.** Expression changes of ABA biosynthetic and metabolic genes in *OsbZIP86*  
118 overexpression transgenic rice.

119 Five ABA biosynthetic genes (*OsNCED1* (A), *OsNCED2* (B), *OsNCED3* (C), *OsNCED4* (D) and  
120 *OsNCED5* (E)) and three ABA metabolic genes (*OsABA8ox1* (F), *OsABA8ox2* (G) and *OsABA8ox3* (H))  
121 were checked in seedlings dried for 1-12 h. Means  $\pm$  SD (n = 3) are shown. All qRT-PCR analyses for  
122 gene expression were performed using three biological replicates with similar results.

123

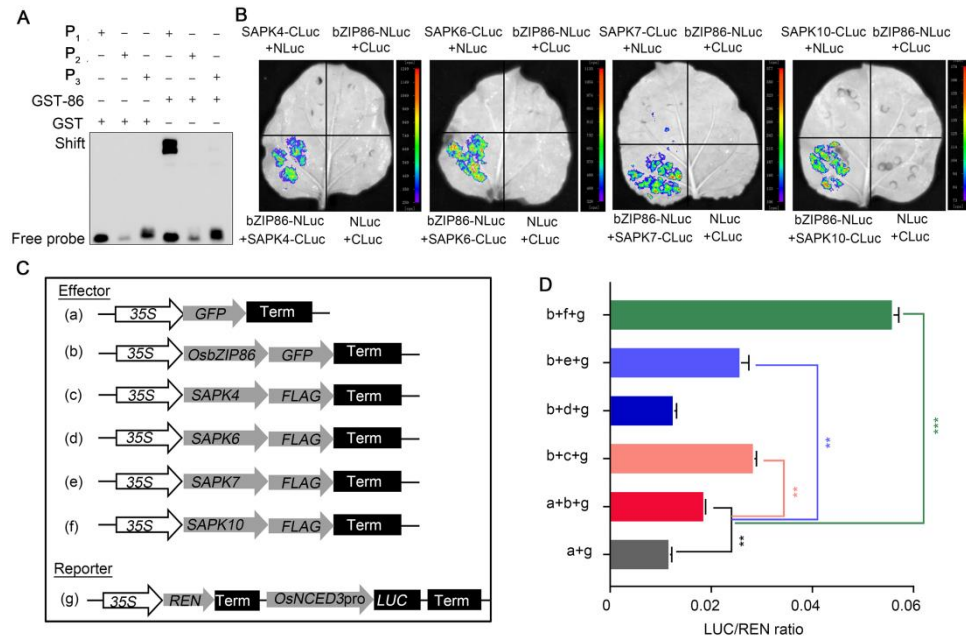

124

125 **Supplemental Figure S7.** OsbZIP86 binds to promoter fragments of *OsNCED3*, and OsbZIP86  
 126 interacts with OsSAPKs to regulate *OsNCED3* expression.

127 (A) *In vitro* electrophoretic mobility shift assay (EMSA) using G-box sequences from promoter of  
 128 *OsNCED3* as probes. The P<sub>1</sub>-P<sub>3</sub> (as shown in Figure 5B) probes were three biotin-labelled fragments of  
 129 the *OsNCED3* promoter containing the G-box motif. GST-tagged OsbZIP86 was purified, and 2 μg  
 130 protein was used. GST-86, fusion protein GST-OsbZIP86; GST, negative control. (B) Luciferase  
 131 complementation imaging (LCI) assays of the interaction between OsbZIP86 and rice SAPK family  
 132 members in tobacco leaves. OsbZIP86 and OsSAPKs (OsSAPK1-OsSAPK10) were fused with NLuc  
 133 and CLuc, respectively, then co-transformed into tobacco leaves by *Agrobacterium* GV3101. Results of  
 134 four OsSAPKs interacted with OsbZIP86 are showed. (C, D) *In vivo* luciferase assay. Schematic  
 135 diagram of various constructs used in the luciferase activity assay (C). Relative activity of the  
 136 *OsNCED3* promoter in tobacco leaves. 35S: *REN-OsNCED3pro*: *LUC* was constructed as the reporter.  
 137 35S: *bZIP86-GFP*, 35S: *SAPK4-FLAG*, 35S: *SAPK6-FLAG*, 35S: *SAPK7-FLAG* and 35S:  
 138 *SAPK10-FLAG* were constructed as effectors. Free GFP was used as a negative control (D). Error bars  
 139 indicate SD with biological triplicates (n = 3). \**p* < 0.05, \*\**p* < 0.01, \*\*\**p* < 0.001 according to  
 140 student's *t*-test.

141



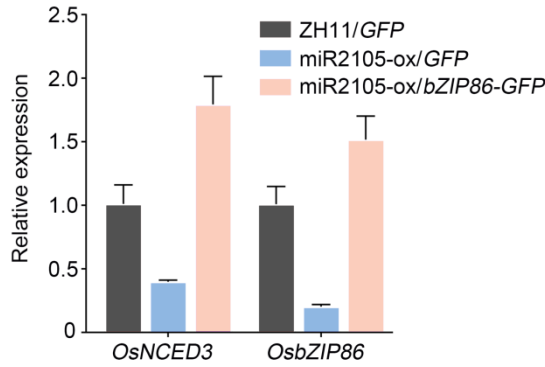

142

143 **Supplemental Figure S8.** Expression changes of *OsNCED3* and *OsbZIP86* in the rice protoplasts of  
 144 ZH11/GFP, miR2105-ox/GFP and miR2105-ox/bZIP86-GFP. ZH11/GFP: The *pCAMBIA1300-GFP*  
 145 plasmid was introduced into rice protoplasts of ZH11; miR2105-ox/GFP: The *pCAMBIA1300-GFP*  
 146 plasmid was introduced into rice protoplasts of miR2105-ox; miR2105-ox/bZIP86-GFP: The  
 147 *pCAMBIA1300-bZIP86-GFP* plasmid was introduced into rice protoplasts of miR2105-ox. GFP was  
 148 used as reference genes, Means  $\pm$ SD (n = 3) are shown.

149

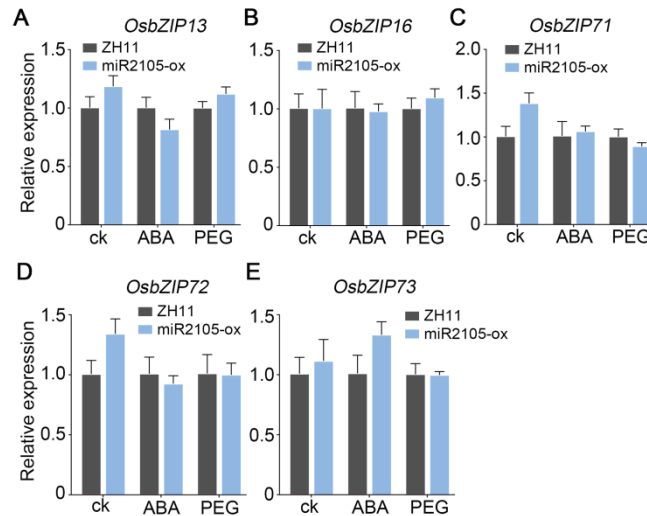

150

151 **Supplemental Figure S9.** The expression changes of several bZIPs in ZH11 and miR2105-ox.  
 152 miR2105 displayed no effect on the expression of other members of bZIPs, including *OsZIP13* (A),  
 153 *OsZIP16* (B), *OsZIP71* (C), *OsZIP72* (D) and *OsZIP73* (E). RNA was isolated from 2-week-old  
 154 rice seedlings grown in Yoshida solution (ck). For ABA and PEG treatments, 2-week-old seedlings  
 155 grown in Yoshida solution were treated with 50  $\mu$ M ABA or 20 % PEG for 2 h. The expression of  
 156 bZIPs under different condition was normalized as 1, respectively. *e-EF-1a* was used as mRNA  
 157 reference gene, Means  $\pm$ SD (n = 3) are shown.

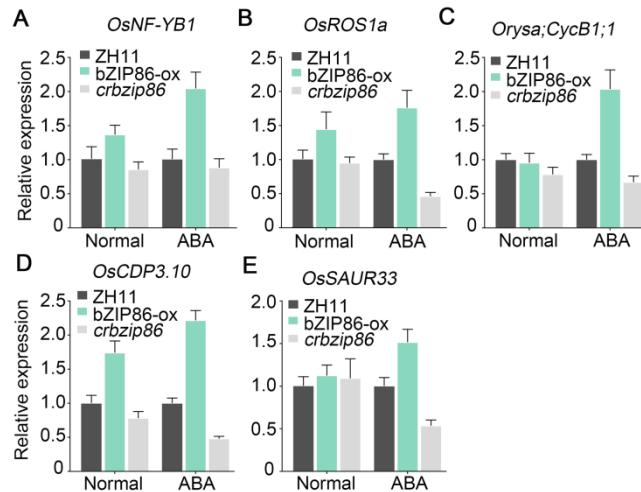

159

160 **Supplemental Figure S10.** Expression changes of early endosperm development genes (A–C) and  
 161 seed vigor-related genes (D–E) in ZH11 and *OsbZIP86* transgenic rice. *e-EF-1a* was used as mRNA  
 162 reference genes, Means  $\pm$ SD (n = 3) are shown.

163

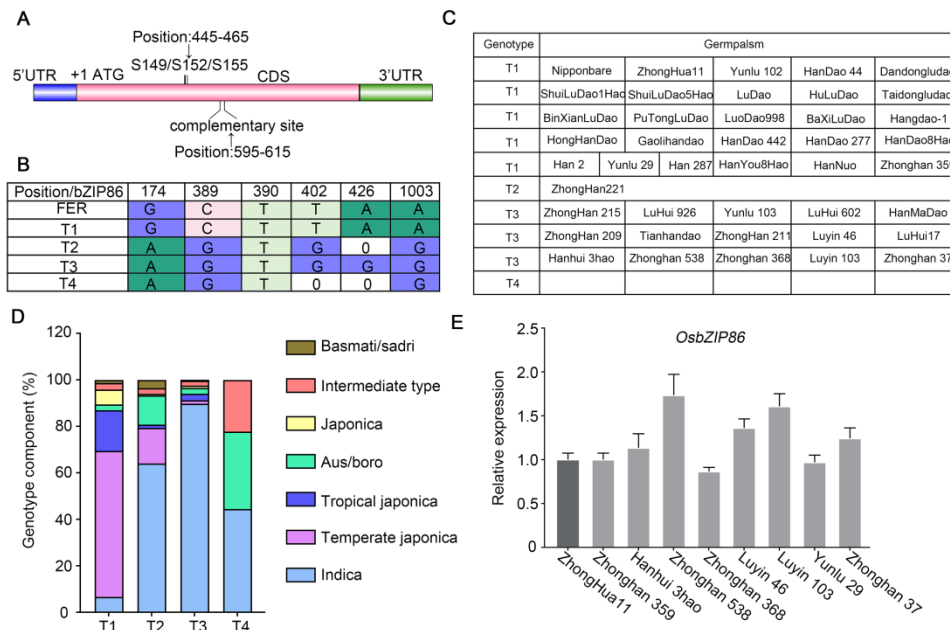

164

165 **Supplemental Figure S11.** The genotype of *OsbZIP86* CDS in various rice germplasm.  
 166 (A) The schematic structure of the cleavage site targeted by miR2105 in the *OsbZIP86* mRNA and the  
 167 predicted phosphorylation sites of *OsbZIP86*. (B) The genotype analysis of *OsbZIP86* CDS in various  
 168 rice germplasm using online tool MBKbase (<http://www.mbkbase.org/>). FER: The genotype of  
 169 Nipponbare. (C) Genotype distribution of different upland rice. (D) The genotype component in  
 170 various upland rice. (E) Expression levels of *OsbZIP86* in seedlings of ZH11 and several upland rice.

171 RNA was isolated from 2-week-old ZH11 and upland rice seedlings grown in Yoshida solution (ck).

172 *e-EF-1a* was used as mRNA reference gene , Means  $\pm$ SD (n = 3) are shown.

173

14 **Supplemental Table S1.** The description of the predicted 13 target genes of miR2105.

| The sequence of pre-miR2105   | 5'-uugugaugugaaucau -3'          |                                                                                       |
|-------------------------------|----------------------------------|---------------------------------------------------------------------------------------|
|                               | Gene ID in MSU                   | Target Description                                                                    |
| The predicted 13 target genes | LOC_Os10g05720                   | cDNA LTPL37 - Protease inhibitor/seed storage/LTP family protein precursor, expressed |
|                               | LOC_Os03g11140                   | cDNA pleckstrin homology domain-containing protein-related taxo, putative, expressed  |
|                               | <b>LOC_Os12g13170 (OsbZIP86)</b> | cDNA transcription factor, putative, expressed                                        |
|                               | LOC_Os10g17850                   | cDNA retrotransposon protein, putative, Ty3-gypsy subclass                            |
|                               | LOC_Os06g05590                   | cDNA OsFBX186 - F-box domain containing protein, expressed                            |
|                               | LOC_Os05g18050                   | cDNA retrotransposon protein, putative, unclassified                                  |
|                               | LOC_Os08g05250                   | cDNA retrotransposon protein, putative, Ty3-gypsy subclass, expressed                 |
|                               | LOC_Os08g23654                   | cDNA retrotransposon protein, putative, Ty3-gypsy subclass, expressed                 |
|                               | LOC_Os02g51164                   | cDNA expressed protein                                                                |
|                               | LOC_Os05g14270                   | cDNA expressed protein                                                                |
|                               | LOC_Os01g43580                   | cDNA kinesin motor domain containing protein, putative, expressed                     |
|                               | LOC_Os08g11650                   | cDNA transposon protein, putative, CACTA, En/Spm sub-class, expressed                 |
|                               | LOC_Os08g11320                   | cDNA transposon protein, putative, CACTA, En/Spm sub-class, expressed                 |

15  
16  
17  
18  
19  
20  
21  
22  
23  
24  
25  
26  
27  
28  
29  
30  
31  
32  
33  
34

35 **Supplemental Table S2.** Primers used in this study.

| List of the primers used in this study |                                     |                                                         |        |
|----------------------------------------|-------------------------------------|---------------------------------------------------------|--------|
| Purpose                                | Primer name                         | Sequence (5'-3')                                        | Vector |
| qRT-PCR primers                        | miR2105-RF                          | GACTGTTGTGATGTGAATGAT                                   |        |
|                                        | miR2105-RR                          | GTGCAGGGTCCGAGGTATTC                                    |        |
|                                        | U6-R-F                              | CGATAAAATGGAAACGATACAGA                                 |        |
|                                        | U6-R-R                              | ATTGGACCATTTCGATTTGT                                    |        |
|                                        | <i>eEF-1a</i> -q-F                  | GCACGCTCTTCTTGCTTTC                                     |        |
|                                        | <i>eEF-1a</i> -q-R                  | AGGGAATCTTGTGAGGGTTG                                    |        |
|                                        | <i>OsbZIP86</i> -q-F                | TGGTAAAACCTCTGGGGCATC                                   |        |
|                                        | <i>OsbZIP86</i> -q-R                | AACTTTGCTGGGATGGTGAA                                    |        |
|                                        | <i>OsNCED1</i> -q-F                 | CTACATCCCTCCTGCTGCTT                                    |        |
|                                        | <i>OsNCED1</i> -q-R                 | CTACCAACTGCTGCTCTCT                                     |        |
|                                        | <i>OsNCED2</i> -q-F                 | TTCGAAGGTACGCCAAGGAT                                    |        |
|                                        | <i>OsNCED2</i> -q-R                 | TCTCTCTCCATCAGCCTCT                                     |        |
|                                        | <i>OsNCED3</i> -q-F                 | TTCGCCATCACCGAGAATA                                     |        |
|                                        | <i>OsNCED3</i> -q-R                 | GAGCATCTCTGGAGCTTGA                                     |        |
|                                        | <i>OsNCED4</i> -q-F                 | GTCCAAGCCGTACCTCAAGT                                    |        |
|                                        | <i>OsNCED4</i> -q-R                 | TCCTGGAGCTTGAAACACGAT                                   |        |
|                                        | <i>OsNCED5</i> -q-F                 | AGGTGTGGCAAGAAGAAGGA                                    |        |
|                                        | <i>OsNCED5</i> -q-R                 | GCACATTCTGTGATGAACCTT                                   |        |
|                                        | <i>OsABA8ox1</i> -q-F               | GTCATCGGCGTCATCTCGC                                     |        |
|                                        | <i>OsABA8ox1</i> -q-R               | TGACCCGGCTCGTCATCTTC                                    |        |
|                                        | <i>OsABA8ox2</i> -q-F               | CTGCTCACCGACGACCAGAT                                    |        |
|                                        | <i>OsABA8ox2</i> -q-R               | CCCTCGTTGGCCACGTAGAT                                    |        |
|                                        | <i>OsABA8ox3</i> -q-F               | TGGCCCTAACCCACAAGGTG                                    |        |
|                                        | <i>OsABA8ox3</i> -q-R               | CGGCATCACCTTCCATCCCT                                    |        |
|                                        | <i>OsbZIP72</i> -q-F                | TGTATTCGCTGACGTTCCGAC                                   |        |
|                                        | <i>OsbZIP72</i> -q-R                | GAGCAGCTCGTCCATGTTC                                     |        |
|                                        | <i>OsbZIP71</i> -q-F                | TGTGTGCCCTAACTGACATCCIGA                                |        |
|                                        | <i>OsbZIP71</i> -q-R                | AAGTCTATGGGTGGCTGGTCCAT                                 |        |
|                                        | <i>OsbZIP16</i> -q-F                | TCCAACATGTCATACCATCTTAG                                 |        |
|                                        | <i>OsbZIP16</i> -q-R                | GCATTGTCTCATCTTCAGTCAC                                  |        |
|                                        | <i>OsbZIP73</i> -q-F                | TCAGTTCCCACTACCACAGCAACA                                |        |
|                                        | <i>OsbZIP73</i> -q-R                | TACCACAGGGAGCAATTCCTGGAT                                |        |
|                                        | <i>OsbZIP13</i> -q-F                | TGGTTCCTTCGCTGTT                                        |        |
| <i>OsbZIP13</i> -q-R                   | TCCCGATTAGACTGCTTCCT                |                                                         |        |
| <i>OsNF-YB1</i> -q-F                   | CAGGGAACAAAAGCGTGGTGGC              |                                                         |        |
| <i>OsNF-YB1</i> -q-R                   | ATCGGCAGCTCGGCGTTGGT                |                                                         |        |
| <i>OsROS1a-q-F</i>                     | CCTAAGGACAGAGCACCAAG                |                                                         |        |
| <i>OsROS1a-q-R</i>                     | GCACATAGTTCACCATTCTC                |                                                         |        |
| <i>OsCycB1;1-q-F</i>                   | AATCTCACCGTTCCTACAGC                |                                                         |        |
| <i>OsCycB1;1-q-R</i>                   | AGTAGAGTGGGAGGTAACAAG               |                                                         |        |
| <i>OsCDP3.10-q-F</i>                   | TCGTTCTTTCAGCGGCTTAGCG              |                                                         |        |
| <i>OsCDP3.10-q-R</i>                   | TTCTCCAATTCTTCCCGCGAGTG             |                                                         |        |
| <i>OsSAUR33-q-F</i>                    | CGGGTAATATCTCCGTCCTTTGCC            |                                                         |        |
| <i>OsSAUR33-q-R</i>                    | TGGCATATCAGCACCGAAACAGG             |                                                         |        |
| Primers for ChIP-qPCR                  | <i>OsNCED3</i> -P <sub>3</sub> -q-F | CGCCAGCCACTCTGGCCGACT                                   |        |
|                                        | <i>OsNCED3</i> -P <sub>3</sub> -q-R | GTGGCTGGCGCCGTCGTCAA                                    |        |
|                                        | <i>OsNCED3</i> -P <sub>2</sub> -q-F | AATCCAGTTGGCACACAGGACTC                                 |        |
|                                        | <i>OsNCED3</i> -P <sub>2</sub> -q-R | TACTACACTTAAAACTTGTCTC                                  |        |
|                                        | <i>OsNCED3</i> -P <sub>1</sub> -q-F | TCGGCTCGCGCGGTCGCCGTCCCC                                |        |
|                                        | <i>OsNCED3</i> -P <sub>1</sub> -q-R | ACGGGGCGTGGCGGTTTGAACG                                  |        |
|                                        | <i>Actin</i> -F                     | GCCACATCACACAGATGTT                                     |        |
| <i>Actin</i> -R                        | ACTTGGTTGAAGGGTGGTC                 |                                                         |        |
| Reverse transcript primers             | miR2105-RT                          | GTCTGATCCAGTGCAGGGTCCGAG<br>GTATTCGACTGGATACGACATGAATCA |        |
|                                        | U6-RT                               | ATTGGACCATTTCGATTTGT                                    |        |
| Primers for 5' RACE                    | Adaptor-5RACE                       | GCUACACucGGUUGGCUUUGAUGAAA                              |        |
|                                        | 5' RACE-out/F                       | GCTACACTCGGTTTGTGGCTT                                   |        |
|                                        | 5' RACE-in/F                        | CGGTTTGTGGCTTTGATG                                      |        |
|                                        | <i>OsbZIP86</i> -5' RACE-out/R      | GCTCAGGAGCATGGCACGATAG                                  |        |
| <i>OsbZIP86</i> -5' RACE-in/R          | CTCTGCTCATCAGTTTGTG                 |                                                         |        |

36

37

38

39

40

41

42

43 **Supplemental Table S2.** Primers used in this study.

| Purpose                                | Primer name                                        | Sequence (5'-3')                           | Vector                      |
|----------------------------------------|----------------------------------------------------|--------------------------------------------|-----------------------------|
| <b>Primers for vector construction</b> |                                                    |                                            |                             |
| <b>OE-construct</b>                    | G-4368                                             | GAAGATCTTCGCAAGGCGATTAAGTTGGGTAAC          | <i>pCAMBIA1301</i>          |
|                                        | G-4369                                             | CCCCTTAAGGCGGATAACAATTCACACAGGAAACAG       |                             |
|                                        | I miR2105-s                                        | agTTGTGATGTAATGATTCATcaggagattcagtttga     |                             |
|                                        | I miR2105-a                                        | tgATGAATCATTCACATCACAActgctgctctacagcc     |                             |
|                                        | III miR2105*s                                      | ctATGAAACATACACATCACAAttcctgctgtagcctg     |                             |
| IV miR2105*a                           | aaTTGTGATGTAATGTTTCATagagaggcaaaagfgaa             | <i>pXU1301-6HA-GFP</i>                     |                             |
| <i>OsZIP86</i> -CDS-6HA-GFP-F          | CCC AAGCTTATGGGTAGCAGTGGCGCAGA                     |                                            |                             |
| <i>OsZIP86</i> -CDS-6HA-GFP-R          | CGGGGTACCGTTTCCTTTTTTCTGGC                         | <i>pXU1301</i>                             |                             |
| STTM2105-F                             | G AAGCTTatgaatcattCTAcacatcacaGTTGTGTGTTATGGTCTAG  |                                            |                             |
|                                        | STTM2105-R                                         | TGGATCCttgtgatgtTAGaatgattcat              | <i>pTCK303</i>              |
|                                        | <i>OsZIP86</i> -RNAi-F                             | ATCTCTCTCTTTAGACCATATCTTCT                 |                             |
| <b>Crispr-cas9 vector</b>              | <i>OsZIP86</i> -RNAi-R                             | CGGGGTACCACTAGTCGTAAGCAGGCTGAATGTGA        | <i>pYLCRISPR/Cas9Pubi-H</i> |
|                                        | <i>OsZIP86</i> -I-CRISPR-F                         | GCGGGATCCGAGCTCTGCCTCATCAGTTTTGTGTT        |                             |
|                                        | <i>OsZIP86</i> -I-CRISPR-R                         | CATGTAAGGATGACCCCTGTgttttagagctagaat       |                             |
|                                        | <i>OsZIP86</i> -II-CRISPR-F                        | ACAGGGTCATCCTTACATGTgcacggatcatctg         |                             |
|                                        | <i>OsZIP86</i> -II-CRISPR-R                        | GGAGTCTGCTCCGAGATCTgttttagagctagaat        |                             |
|                                        | <i>OsZIP86</i> -III-CRISPR-F                       | AGATCTGCGAGCAGACTCCCGcagggatcatctg         |                             |
|                                        | <i>OsZIP86</i> -III-CRISPR-R                       | CATCATACTCTTCTGTATCgttttagagctagaat        |                             |
|                                        | <i>OsZIP86</i> -III-CRISPR-R                       | GATCAGAAAGGAGTATGATGTgcacggatcatctg        |                             |
| <b>Subcellular location</b>            | <i>OsZIP86</i> -5'GFP-F                            | GGACTAGTATGGGTAGCAGTGGCGCA                 | <i>pUC18</i>                |
|                                        | <i>OsZIP86</i> -5'GFP-R                            | GGGGTACCGTTTCCTTTTTTCTGGC                  |                             |
| <b>GUS histochemical analysis</b>      | Pro- <i>OsZIP86</i> -F                             | GAATTCGAGCTCGGTACCAATACCCACACCCACAC        | <i>pCAMBIA1301</i>          |
|                                        | Pro- <i>OsZIP86</i> -R                             | AAATTTACCCTCAGATCTCAGATACACAGAGCAGTGAT     |                             |
| <b>LCI</b>                             | <i>OsZIP86</i> -Nluc-F                             | GGGACGAGCTCGGTACCATGGGTAGCAGTGGCG          | <i>pCAMBIA1300-NLuc</i>     |
|                                        | <i>OsZIP86</i> -Nluc-R                             | TACGAGATCTGTCGACGTTTCCTTTTTTCTGGC          |                             |
|                                        | <i>OsSAPK1</i> -CLuc-F                             | CGTCCCGGGGCGGTACCATGGAGCGGTACGAGGTGATG     |                             |
|                                        | <i>OsSAPK1</i> -CLuc-R                             | AAGCTCTGCAGGTGACTACAAGGCGCACACGAAG         |                             |
|                                        | <i>OsSAPK2</i> -CLuc-F                             | CGTCCCGGGGCGGTACCATGGAGAGGTACGAGGTGATCAA   |                             |
|                                        | <i>OsSAPK2</i> -CLuc-R                             | AAGCTCTGCAGGTGACTACAATGCGCACACGAAGT        |                             |
|                                        | <i>OsSAPK3</i> -CLuc-F                             | CGTCCCGGGGCGGTACCATGGAGGAGAGGTACGAGGCG     |                             |
|                                        | <i>OsSAPK3</i> -CLuc-R                             | AAGCTCTGCAGGTGACTACGTAGGTGTCTACTCATCGGC    |                             |
|                                        | <i>OsSAPK4</i> -CLuc-F                             | CGTCCCGGGGCGGTACCATGGAGAAAGTACGAGGCGGTG    |                             |
|                                        | <i>OsSAPK4</i> -CLuc-R                             | AAGCTCTGCAGGTGACTATATGCGCAGTACGCTCATAC     |                             |
|                                        | <i>OsSAPK5</i> -CLuc-F                             | CGTCCCGGGGCGGTACCATGGAGAAATACGAGCCAGTTCG   |                             |
|                                        | <i>OsSAPK5</i> -CLuc-R                             | AAGCTCTGCAGGTGACTACGGAGATTTGGAGGTTTGACA    |                             |
|                                        | <i>OsSAPK6</i> -CLuc-F                             | CGTCCCGGGGCGGTACCATGGAGAAAGTACGAGTGTCTCAA  |                             |
|                                        | <i>OsSAPK6</i> -CLuc-R                             | AAGCTCTGCAGGTGACTACAGCTCTTCTGCAAGTACAGC    |                             |
|                                        | <i>OsSAPK7</i> -CLuc-F                             | CGTCCCGGGGCGGTACCATGGAGAGGTACGAGTGTCTCA    |                             |
|                                        | <i>OsSAPK7</i> -CLuc-R                             | AAGCTCTGCAGGTGACTACGTAGCTGAGCTGAAACTACCA   |                             |
|                                        | <i>OsSAPK8</i> -CLuc-F                             | CGTCCCGGGGCGGTACCATGGACGCGGCGGGGGCC        |                             |
|                                        | <i>OsSAPK8</i> -CLuc-R                             | AAGCTCTGCAGGTGACTATACATGATAGCAGTATCTCGC    |                             |
|                                        | <i>OsSAPK9</i> -CLuc-F                             | CGTCCCGGGGCGGTACCATGGAGAGGCGGCGGGCG        |                             |
|                                        | <i>OsSAPK9</i> -CLuc-R                             | AAGCTCTGCAGGTGACTTACATGATATACGATCTCTCCG    |                             |
| <i>OsSAPK10</i> -CLuc-F                | CGTCCCGGGGCGGTACCATGGACCGGGCGGCGCTG                |                                            |                             |
| <i>OsSAPK10</i> -CLuc-R                | AAGCTCTGCAGGTGACTACATAGCTGATACTATCTCCCA            |                                            |                             |
| <b>BiFC</b>                            | cYFP- <i>OsZIP86</i> -F                            | TCCAGCTCAAGCTTCGAATTCATGGGTAGCAGTGGCG      | <i>pSATN-cYFP-C1</i>        |
|                                        | cYFP- <i>OsZIP86</i> -R                            | GTACCCGTCGACTGCAAGAATCTTTAGTTTCTTTTTTCTGGC |                             |
|                                        | nYFP- <i>OsSAPK10</i> -F                           | GGTACC CGGGCCCGGGATCCATGGACCGGGCGGCGCTG    |                             |
|                                        | nYFP- <i>OsSAPK10</i> -R                           | GACTCTAGATCAGGTGGATCCATCAGTATGCTATCTCCCA   | <i>pSATN-nYFP-C1</i>        |
| <b>Pull down</b>                       | GST- <i>OsZIP86</i> -F                             | GATCTGGTTCCCGGTGGATCCATGGGTAGCAGTGGCG      |                             |
|                                        | GST- <i>OsZIP86</i> -R                             | GATGCGCGCGCTCGAGTCCGACTTAGTTTCTTTTTTCTGGC  |                             |
|                                        | MBP- <i>OsSAPK10</i> -F                            | TTCAGAATTCGGATCCATGGACCGGGCGGCGCTG         |                             |
|                                        | MBP- <i>OsSAPK10</i> -R                            | CTTGGCTGTCAGTCCGACTACATAGCTGATACTATCTCCCA  |                             |
| <b>Co-IP</b>                           | <i>OsZIP86</i> -FLAG-F                             | TCTCTCTCAAGCTTGGATCCATGGGTAGCAGTGGCG       | <i>pHB-3×FLAG</i>           |
|                                        | <i>OsZIP86</i> -FLAG-R                             | ATACCGTCACTAGTGGATCCGCTTTCTTTTTTCTGGC      |                             |
|                                        | <i>OsSAPK10</i> -GFP-F                             | ACTAGTGGATCCGGTACCATGGACCGGGCGGCGCTG       |                             |
|                                        | <i>OsSAPK10</i> -GFP-R                             | CTTGTCTACCATGGTACCATAGCGTATACTATCTCCCA     |                             |
| <b>EMSA</b>                            | Biotin- <i>OsNCED3</i> -EMSA-P <sub>1</sub> F      | CCTCCCCCGGAGCGCACACCGTGGGACCCCAACCCCTC     |                             |
|                                        | Biotin- <i>OsNCED3</i> -EMSA-P <sub>1</sub> R      | GAGGGGGTTGGGTGCCACGTTGTGCGTCCGGGGGAGG      |                             |
|                                        | Biotin- <i>OsNCED3</i> -EMSA-P <sub>2</sub> F      | GCTGTACTTGGCCGATCAGCTTTTACTGCAACAGAAATT    |                             |
|                                        | Biotin- <i>OsNCED3</i> -EMSA-P <sub>2</sub> R      | AAATTCGTGTGGCAGTAAACGTGATCGGCCAAGTAGCAGC   |                             |
|                                        | Biotin- <i>OsNCED3</i> -EMSA-P <sub>3</sub> F      | CCACCTCAGCATCACCCGCCACGTCGGCAGGGGGACGG     |                             |
|                                        | Biotin- <i>OsNCED3</i> -EMSA-P <sub>3</sub> R      | CCGTCCCTGCGCAGTGGCGGGGTGATGTGAGGTGG        |                             |
| <b>Nonlabelled probe</b>               | <i>OsNCED3</i> -EMSA-P <sub>1</sub> F              | CCTCCCCCGGAGCGCACACGTTGGGACCCCAACCCCTC     |                             |
|                                        | <i>OsNCED3</i> -EMSA-P <sub>1</sub> R              | GAGGGGGTTGGGTGCCACGTTGTGCGTCCGGGGGAGG      |                             |
| <b>Dual-Luciferase assay</b>           | Pro- <i>OsNCED3</i> -pGreenII-Luc-F                | GACGGTATCGAT AAGCTTGGCGTAACTTCTCATACGG     | <i>pGreenII0800-LUC</i>     |
|                                        | Pro- <i>OsNCED3</i> -pGreenII-Luc-R                | TCTAGAAGTGGATCCATCGCTCGATCGCACAAAC         |                             |
|                                        | <i>OsZIP86</i> -GFP-F                              | ACTAGTGGATCCGGTACCATGGGTAGCAGTGGCGCAGA     | <i>pCAMBIA1300-GFP</i>      |
|                                        | <i>OsZIP86</i> -GFP-R                              | CTTGTCTACCATGGTACCATTTCTTTTTTCTGGC         |                             |
|                                        | <i>OsSAPK4</i> -FLAG-F                             | TCTCTCTCAAGCTTGGATCCATGGAGAAAGTACGAGGCGGTG | <i>pHB-3×FLAG</i>           |
|                                        | <i>OsSAPK4</i> -FLAG-R                             | ATACCGTCACTAGTGGATCCATGCGCAGTGGCTCATAC     |                             |
|                                        | <i>OsSAPK6</i> -FLAG-F                             | TCTCTCTCAAGCTTGGATCCATGGAGAAAGTACGAGTGTCAA |                             |
|                                        | <i>OsSAPK6</i> -FLAG-R                             | ATACCGTCACTAGTGGATCCGCTTCTGCAAGTACAGC      |                             |
|                                        | <i>OsSAPK7</i> -FLAG-F                             | TCTCTCTCAAGCTTGGATCCATGGAGAGGTACGAGTGTCTCA |                             |
|                                        | <i>OsSAPK7</i> -FLAG-R                             | ATACCGTCACTAGTGGATCCGCTGAGCTGAAACTACCA     |                             |
|                                        | <i>OsSAPK10</i> -FLAG-F                            | TCTCTCTCAAGCTTGGATCCATGGACCGGGCGGCGCTG     |                             |
|                                        | <i>OsSAPK10</i> -FLAG-R                            | ATACCGTCACTAGTGGATCCATAGCGTATACTATCTCCCA   |                             |
|                                        | <i>OsZIP86</i> <sup>SI49A/SI52A/SI55A</sup> -GFP-R | CGCACCTAAAGCTCTTTGGCTCTTTTAAATGGGACTT      | <i>pCAMBIA1300-GFP</i>      |
|                                        | <i>OsZIP86</i> <sup>SI49A/SI52A/SI55A</sup> -GFP-F | GCCAAAGGAGCTTTAGTGGCTGTAATGATGATTACA       |                             |
|                                        | <i>OsSAPK10</i> <sup>SI77A</sup> -FLAG-F           | GGCTTTTGTGTGCGAATGAAGAACAGA                |                             |
|                                        | <i>OsSAPK10</i> <sup>SI77A</sup> -FLAG-R           | ACCAAAGCCACTGTTGGAATCCCGC                  | <i>pHB-3×FLAG</i>           |

44

45 Note: Red marks indicate restriction sites.
